# Supplementary material for: The conservation and signatures of lincRNAs in Marek’s disease of chicken
Source: PubMed Central journal article supplement (PMC4608010; doi:10.1038/srep15184), 2015-10-16
Supplement: srep15184-s4.pdf [file srep15184-s4.pdf]

# The conservation and signatures of lincRNAs in Marek's disease of chicken

Yanghua He<sup>1\*</sup>, Yi Ding<sup>1\*</sup>, Fei Zhan<sup>1\*</sup>, Huanmin Zhang<sup>2</sup>, Bo Han<sup>4</sup>, Gangqing Hu<sup>3</sup>, Keji Zhao<sup>3</sup>, Ning Yang<sup>4</sup>, Ying Yu<sup>4</sup>, Li Mao<sup>5</sup>, Jiuzhou Song<sup>1§</sup>

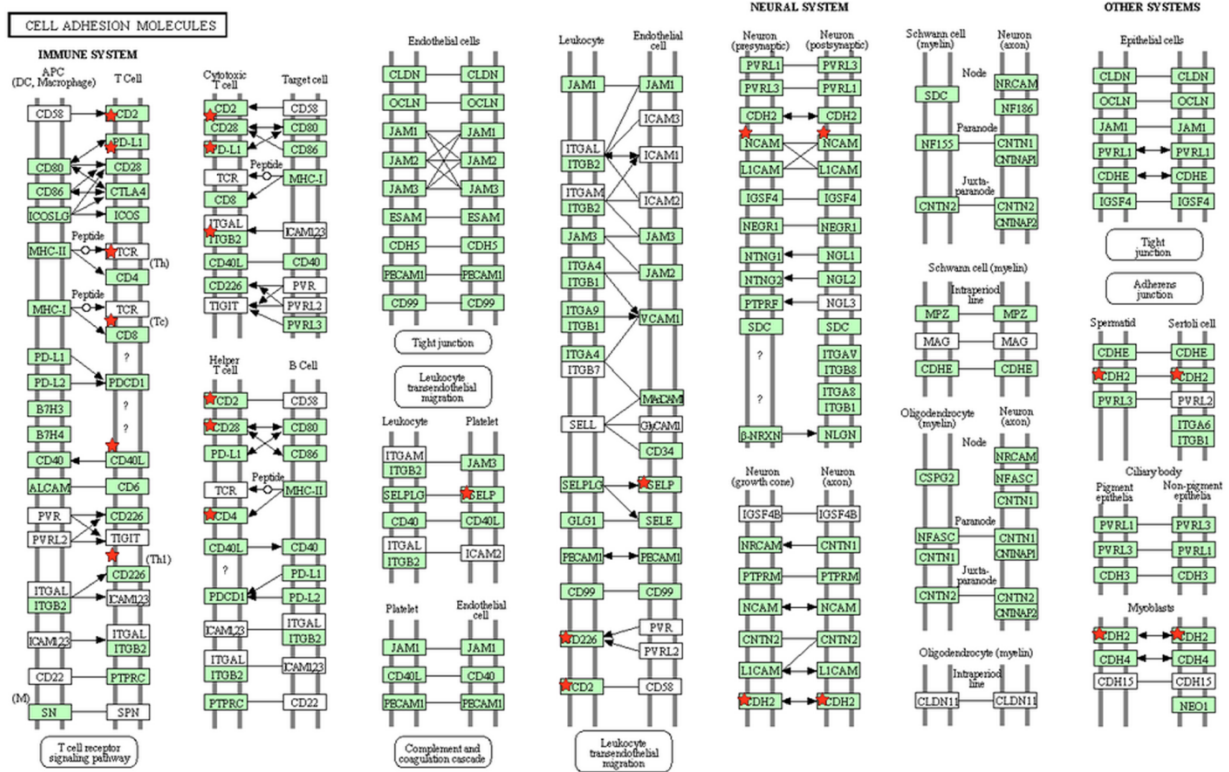

Supplementary Figure 1 | Cell adhesion molecules pathway involving by up-regulated differential expressed genes after MDV infection in line 63. List genes are shown in red star.

CYTOKINE-CYTOKINE RECEPTOR INTERACTION

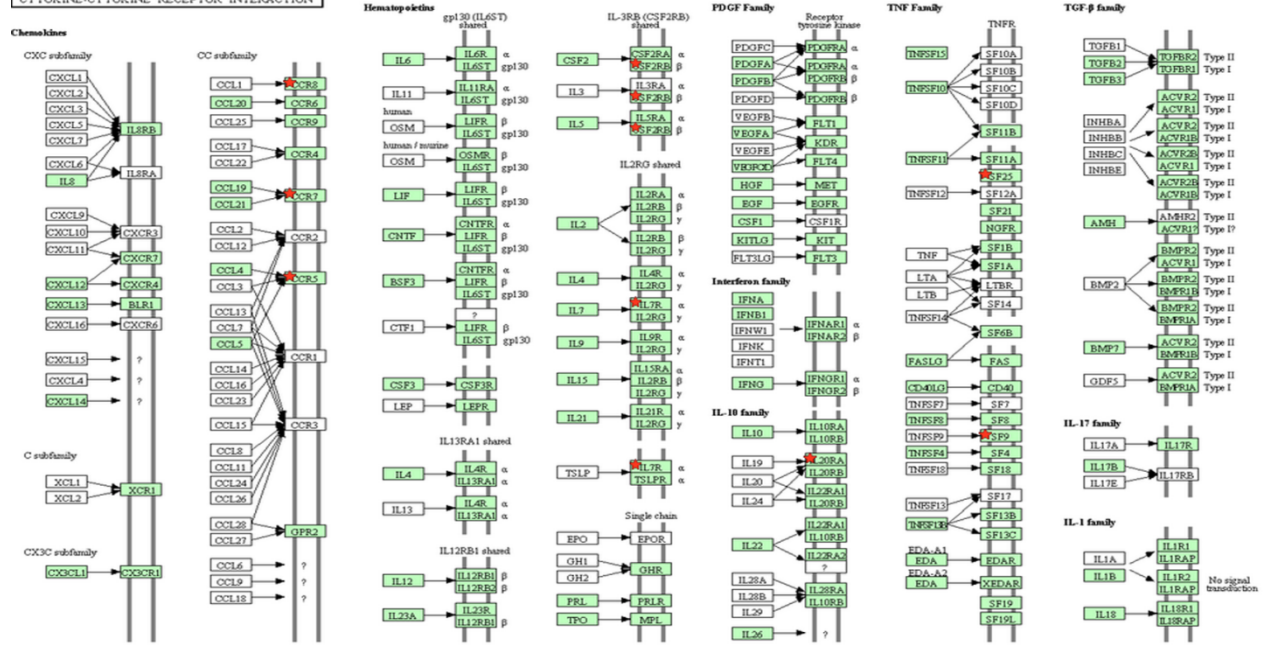

Supplementary Figure 2 | Cytokine-cytokine receptor interaction pathway involving by up-regulated differential expressed genes after MDV infection in line 63. List genes are shown in red star.

### The investigation of scientific literatures about diseases related to SATB1 gene

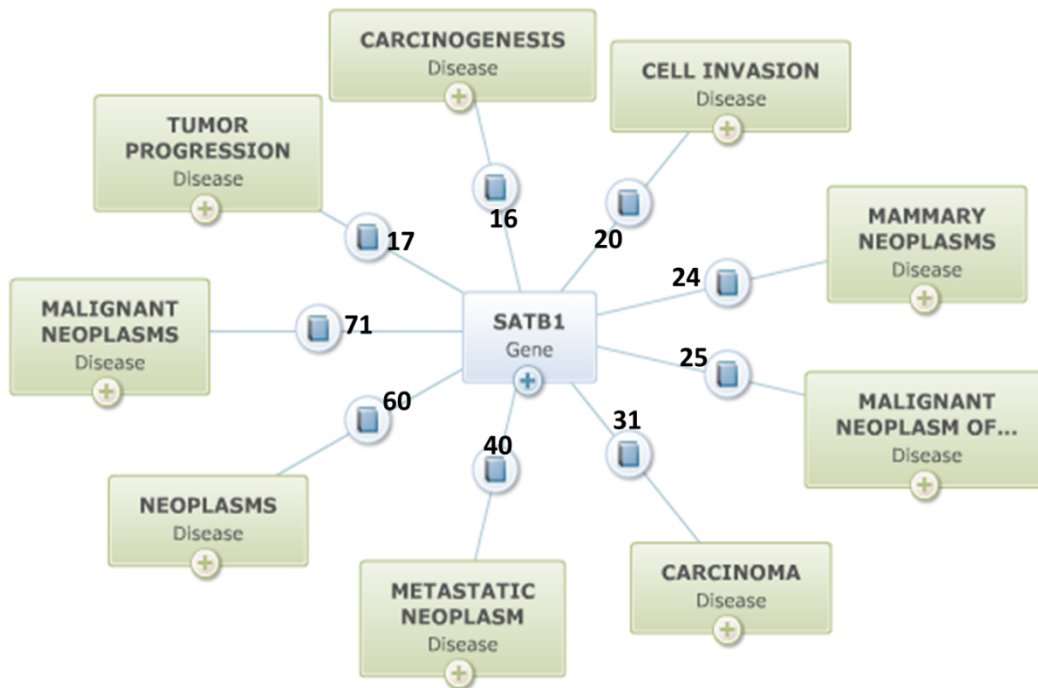

Supplementary Figure 3 | The investigation of scientific literatures about diseases related to *SATB1* gene. The number indicates number of publications corresponding to this particular disease up to now.

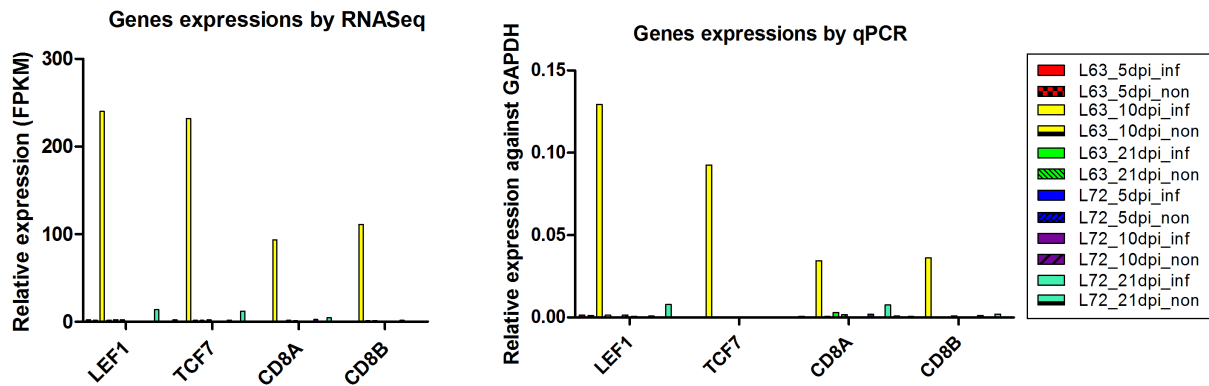

**Supplementary Figure 4 | The validation of expression about *SATB1* related genes by qPCR experiments.** *LEF1* and *TCF7* as T lymphocyte associated activators as well as cytotoxic T cell co-receptor *CD8A* and *CD8B* were chosen to validate their expressions across two conditions of two chicken lines at three time points.

### lincRNAs expressions by RNASeq

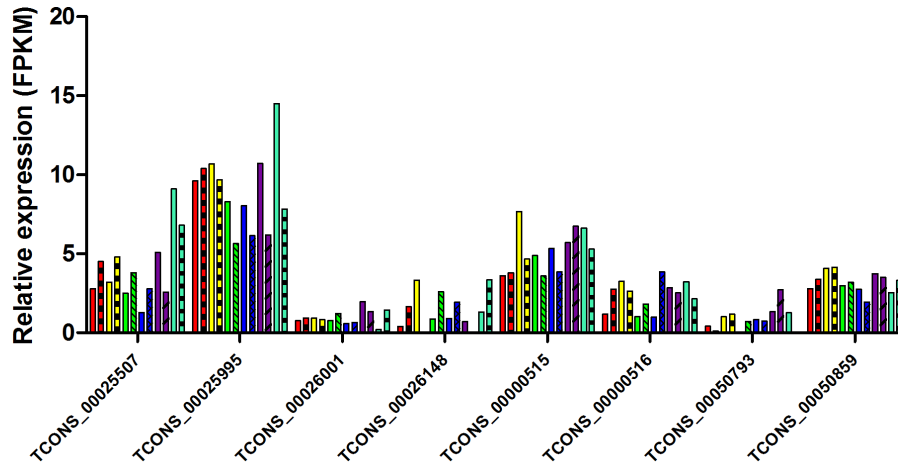

### lincRNAs expressions by qPCR

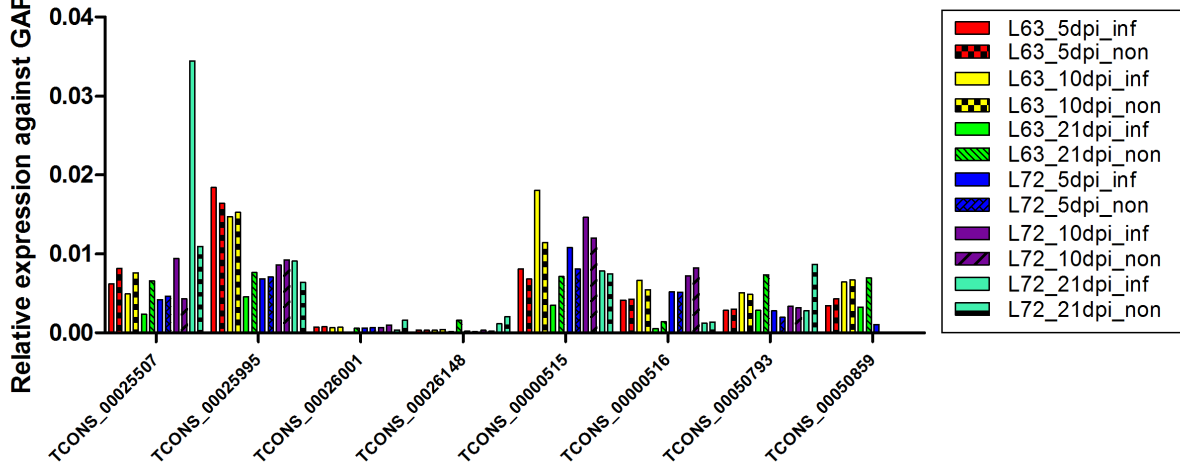

**Supplementary Figure 5 | The validation of candidate lincRNAs expressions by qPCR experiments in various treatment conditions.** The expression levels were normalized against *GAPDH* cDNA in the corresponding samples.

**Supplementary Table 1 | Mapping statistics of sequencing reads**

| Line | DPI   | Treatment    | Raw reads  | Mapped reads | Unmapped reads | Percent mapped |
|------|-------|--------------|------------|--------------|----------------|----------------|
| L63  | 5dpi  | Infected     | 26,436,718 | 22,757,281   | 3,679,437      | 86.08%         |
|      |       |              | 25,362,239 | 21,849,245   | 3,512,994      | 86.15%         |
|      |       | Non-infected | 20,830,331 | 13,103,489   | 7,726,842      | 62.91%         |
|      |       |              | 20,217,983 | 14,613,688   | 5,604,295      | 72.28%         |
|      | 10dpi | Infected     | 32,070,953 | 27,650,629   | 4,420,324      | 86.22%         |
|      |       |              | 27,656,512 | 23,698,520   | 3,957,992      | 85.69%         |
|      |       | Non-infected | 19,643,972 | 11,361,656   | 8,282,316      | 57.84%         |
|      |       |              | 17,741,686 | 11,756,499   | 5,985,187      | 66.26%         |
|      | 21dpi | Infected     | 24,764,470 | 19,245,364   | 5,519,106      | 77.71%         |
|      |       |              | 16,377,980 | 14,098,784   | 2,279,196      | 86.08%         |
|      |       | Non-infected | 23,120,214 | 17,400,805   | 5,719,409      | 75.26%         |
|      |       |              | 12,829,650 | 9,403,356    | 3,426,294      | 73.29%         |
| L72  | 5dpi  | Infected     | 27,855,862 | 19,824,345   | 8,031,517      | 71.17%         |
|      |       |              | 31,178,311 | 20,499,964   | 10,678,347     | 65.75%         |
|      |       | Non-infected | 33,818,194 | 21,314,161   | 12,504,033     | 63.03%         |
|      |       |              | 31,334,208 | 20,067,622   | 11,266,586     | 64.04%         |
|      | 10dpi | Infected     | 21,258,758 | 13,979,594   | 7,279,164      | 65.76%         |
|      |       |              | 20,030,690 | 13,809,847   | 6,220,843      | 68.94%         |
|      |       | Non-infected | 24,005,256 | 16,038,502   | 7,966,754      | 66.81%         |
|      |       |              | 28,146,097 | 19,191,739   | 8,954,358      | 68.19%         |
|      | 21dpi | Infected     | 30,141,835 | 15,226,575   | 14,915,260     | 50.52%         |
|      |       |              | 29,783,547 | 12,667,613   | 17,115,934     | 42.53%         |
|      |       | Non-infected | 24,061,054 | 15,483,473   | 8,577,581      | 64.35%         |
|      |       |              | 29,227,316 | 21,234,014   | 7,993,302      | 72.65%         |

**Supplementary Table 2 | Enriched GO terms for lincRNA neighboring protein-coding genes**

| <b>Term</b> | <b>Description</b>                               | <b>Number of neighboring genes</b> | <b>P-value</b> |
|-------------|--------------------------------------------------|------------------------------------|----------------|
| GO:0042981  | regulation of apoptosis                          | 19                                 | 0.000991       |
| GO:0001568  | blood vessel development                         | 11                                 | 0.002544       |
| GO:0045449  | regulation of transcription                      | 44                                 | 0.031890       |
| GO:0032268  | regulation of cellular protein metabolic process | 12                                 | 0.004934       |
| GO:0006796  | phosphate metabolic process                      | 30                                 | 0.027536       |

**Supplementary Table 3 | Pathways of differential upregulated genes by MDV infection in line 6<sub>3</sub>**

| <b>Cell adhesion molecules (CAMs) pathway</b>         |                    |                                                                                   |                    |                    |                    |                    |
|-------------------------------------------------------|--------------------|-----------------------------------------------------------------------------------|--------------------|--------------------|--------------------|--------------------|
| ID                                                    | ENSEMBL_GENE_ID    | GENE NAME                                                                         | L63_10dpi_inf_FPKM | L63_10dpi_non_FPKM | L72_21dpi_inf_FPKM | L72_21dpi_non_FPKM |
| 1                                                     | ENSGALG00000015463 | CD2 molecule                                                                      | 21.0648            | 4.48068            | NS                 | NS                 |
| 2                                                     | ENSGALG00000013748 | CD226 molecule                                                                    | 14.4446            | 1.48143            | NS                 | NS                 |
| 3                                                     | ENSGALG00000008669 | CD28 molecule                                                                     | 68.076             | 1.20588            | 16.0991            | 2.75903            |
| 4                                                     | ENSGALG00000014477 | CD4 molecule                                                                      | 54.2343            | 1.0946             | 23.5649            | 0.42153            |
| 5                                                     | ENSGALG00000015816 | CD8a molecule                                                                     | 91.0804            | 0.796491           | NS                 | NS                 |
| 6                                                     | ENSGALG00000015902 | CD8b molecule                                                                     | 102.911            | 0.974445           | NS                 | NS                 |
| 7                                                     | ENSGALG00000015132 | cadherin 2, type 1, N-cadherin (neuronal)                                         | 5.25906            | 1.05938            | NS                 | NS                 |
| 8                                                     | ENSGALG00000008656 | inducible T-cell co-stimulator                                                    | 33.1506            | 2.58348            | 24.2536            | 2.56503            |
| 9                                                     | ENSGALG00000002643 | selectin P (granule membrane protein 140kDa, antigen CD62)                        | 12.7475            | 3.08303            | NS                 | NS                 |
| <b>Cytokine-cytokine receptor interaction pathway</b> |                    |                                                                                   |                    |                    |                    |                    |
| 1                                                     | ENSGALG00000011733 | chemokine (C-C motif) receptor 2                                                  | 11.8788            | 3.18372            | 45.4437            | 3.87589            |
| 2                                                     | ENSGALG00000003888 | chemokine (C-C motif) receptor 7                                                  | 41.996             | 6.08314            | NS                 | NS                 |
| 3                                                     | ENSGALG00000011954 | chemokine (C-C motif) receptor 8                                                  | 4.46522            | 0.709297           | 27.1077            | 0.551175           |
| 4                                                     | ENSGALG00000011734 | chemokine (C-C motif) receptor 8                                                  | 3.84244            | 0.323736           | 9.59802            | 0.827927           |
| 5                                                     | ENSGALG00000012518 | colony stimulating factor 2 receptor, beta, low-affinity (granulocyte-macrophage) | 7.44588            | 1.743              | NS                 | NS                 |
| 6                                                     | ENSGALG00000013869 | interleukin 20 receptor, alpha                                                    | 17.0242            | 4.63652            | 23.5236            | 3.78336            |
| 7                                                     | ENSGALG00000013372 | interleukin 7 receptor                                                            | 16.098             | 3.21868            | 10.2675            | 1.64534            |
| 8                                                     | ENSGALG00000017614 | similar to death receptor 3                                                       | 40.0386            | 5.33619            | NS                 | NS                 |
| 9                                                     | ENSGALG00000000543 | tumor necrosis factor receptor superfamily, member 9                              | 47.8573            | 14.7241            | 57.6137            | 12.1837            |

Note: 'NS' represents no significant difference between infected and non-infected chickens (FDR > 0.05).



**Supplementary Table 4 | Fold changes of lincRNAs expressions between infected and non-infected chickens across two lines and three time points as well as their nearest gene associated with immune response**

|    | lincRNAs        | L63_5<br>dpi | L63_10<br>dpi | L63_21<br>dpi | L72_5<br>dpi | L72_10<br>dpi | L72_21<br>dpi | Transcript         | Nearest gene           | Distance |
|----|-----------------|--------------|---------------|---------------|--------------|---------------|---------------|--------------------|------------------------|----------|
| 1  | XLOC_068<br>940 | -0.038       | 2.112         | 0.253         | -0.589       | -0.758        | 0.406         | TCONS_000<br>70365 | ENSGALG00<br>000005543 | 8002     |
| 2  | XLOC_000<br>789 | 0.059        | 1.577         | 0.000         | -0.649       | -0.074        | 0.342         | TCONS_000<br>01017 | ENSGALG00<br>000015494 | 9930     |
| 3  | XLOC_063<br>601 | 0.496        | 2.229         | -0.448        | -1.070       | -0.852        | 0.662         | TCONS_000<br>64948 | ENSGALG00<br>000008466 | 5242     |
| 4  | XLOC_068<br>939 | 0.067        | 2.985         | -0.032        | -0.777       | -0.032        | 1.413         | TCONS_000<br>70364 | ENSGALG00<br>000005544 | 8730     |
| 5  | XLOC_024<br>972 | -0.024       | 1.817         | -0.022        | -0.328       | 0.184         | 1.441         | TCONS_000<br>25556 | NM_20<br>5396          | 7834     |
| 6  | XLOC_024<br>939 | 0.153        | 3.969         | -0.205        | -0.310       | 0.186         | 1.026         | TCONS_000<br>25519 | NM_00119964<br>4       | 4335     |
| 7  | XLOC_049<br>658 | 0.156        | 1.767         | 0.146         | -0.649       | 0.172         | 1.678         | TCONS_000<br>50808 | ENSGALG00<br>000016038 | 74670    |
| 8  | XLOC_071<br>992 | 0.314        | 1.052         | 0.029         | -1.244       | 0.711         | 1.720         | TCONS_000<br>73753 | NM_204604              | 61542    |
| 9  | XLOC_022<br>076 | 0.403        | 0.556         | -0.361        | -0.742       | 0.636         | 1.321         | TCONS_000<br>22602 | ENSGALG00<br>000002982 | 559      |
| 10 | XLOC_022<br>110 | 0.204        | 1.155         | 0.111         | -2.478       | 0.650         | 1.761         | TCONS_000<br>22640 | ENSGALG00<br>000003677 | 17286    |
| 11 | XLOC_075<br>869 | 0.256        | 0.135         | 0.073         | -2.010       | -0.830        | 0.846         | TCONS_000<br>78338 | ENSGALG00<br>000000273 | 1460     |
| 12 | XLOC_075<br>809 | -0.448       | 1.293         | -1.206        | -2.014       | 0.514         | 0.398         | TCONS_000<br>78256 | ENSGALG00<br>000014714 | 1700     |
| 13 | XLOC_025<br>293 | 0.125        | 0.761         | -0.129        | -0.439       | 0.195         | -0.338        | TCONS_000<br>25976 | ENSGALG00<br>000017395 | 1234     |
| 14 | XLOC_035<br>285 | 0.171        | 0.148         | 0.280         | -0.118       | -0.631        | 0.164         | TCONS_000<br>36079 | ENSGALG00<br>000007250 | 1708     |
| 15 | XLOC_075<br>868 | -0.267       | 0.712         | 0.297         | -1.529       | 0.130         | 0.745         | TCONS_000<br>78337 | ENSGALG00<br>000000264 | 4272     |
| 16 | XLOC_056        | 0.359        | 1.903         | 0.507         | -0.690       | 0.773         | -0.203        | TCONS_000          | NM_204801              | 641      |

|    |                 |        |        |        |        |        |        |                    |                        |       |
|----|-----------------|--------|--------|--------|--------|--------|--------|--------------------|------------------------|-------|
|    | 648             |        |        |        |        |        |        | 57885              |                        |       |
| 17 | XLOC_068<br>949 | -0.019 | 1.799  | -0.004 | -0.263 | 0.141  | -0.180 | TCONS_000<br>70375 | ENSGALG00<br>000005118 | 9309  |
| 18 | XLOC_041<br>314 | 0.422  | 0.905  | 0.791  | -0.467 | 0.212  | -0.160 | TCONS_000<br>42404 | ENSGALG00<br>000022887 | 1916  |
| 19 | XLOC_000<br>726 | 0.000  | 1.062  | 0.518  | -0.463 | 0.000  | 0.000  | TCONS_000<br>00927 | ENSGALG00<br>000017280 | 1620  |
| 20 | XLOC_066<br>491 | -0.009 | 3.031  | -0.250 | -0.417 | -0.345 | -0.011 | TCONS_000<br>67888 | ENSGALG00<br>000002182 | 78152 |
| 21 | XLOC_056<br>530 | 0.031  | 1.072  | 0.025  | -0.661 | 0.062  | 0.080  | TCONS_000<br>57745 | NM_00101258<br>5       | 20746 |
| 22 | XLOC_015<br>830 | 0.000  | 2.092  | -0.516 | -0.149 | 0.189  | -0.190 | TCONS_000<br>16228 | ENSGALG00<br>000020778 | 12608 |
| 23 | XLOC_072<br>297 | 0.857  | 0.783  | -0.017 | -0.428 | 0.000  | 1.904  | TCONS_000<br>74211 | ENSGALG00<br>000003238 | 42910 |
| 24 | XLOC_022<br>092 | -0.065 | 0.434  | -0.131 | -0.261 | 0.527  | 1.027  | TCONS_000<br>22620 | ENSGALG00<br>000008886 | 973   |
| 25 | XLOC_049<br>655 | 0.773  | 2.079  | -1.621 | -0.634 | -0.283 | 2.763  | TCONS_000<br>50802 | NM_204991              | 60541 |
| 26 | XLOC_017<br>708 | 0.989  | 0.624  | 1.874  | -0.616 | 0.410  | 2.580  | TCONS_000<br>18157 | ENSGALG00<br>000007620 | 2357  |
| 27 | XLOC_019<br>436 | 0.097  | 0.487  | 0.491  | 0.311  | 0.239  | 0.504  | TCONS_000<br>19915 | ENSGALG00<br>000004460 | 140   |
| 28 | XLOC_025<br>407 | -0.659 | 0.401  | -0.210 | 0.110  | 2.180  | 0.803  | TCONS_000<br>26130 | ENSGALG00<br>000012741 | 64086 |
| 29 | XLOC_073<br>134 | 0.210  | 0.529  | -0.581 | -0.609 | -0.068 | 0.294  | TCONS_000<br>75433 | ENSGALG00<br>000022091 | 5043  |
| 30 | XLOC_025<br>574 | 0.049  | -0.466 | -0.379 | 0.449  | 0.968  | -0.822 | TCONS_000<br>26325 | NM_00101255<br>5       | 3003  |

**Supplementary Table 5 | Identifying the initiation codons in linc-satb1 sequence by Prediction of Translation Initiation ATG (<http://atgpr.dbcls.jp/>)**

| No. of ATG from 5' end <sup>1</sup> | Reliability <sup>2</sup> | Frame | Identity to Kozak rule A/GXXATGG | Start (bp) | Finish (bp) | ORF Length (aa) | Stop codon found? | Sequence                                                         |
|-------------------------------------|--------------------------|-------|----------------------------------|------------|-------------|-----------------|-------------------|------------------------------------------------------------------|
| 46                                  | 0.09                     | 2     | GXXATGc                          | 2333       | 2491        | 53              | Yes               | MLLWHNDLEISFCVRRRAIGSSGKHY<br>RYFPVPRHVNMFRRHEQRVELGSGV<br>GWG   |
| 9                                   | 0.07                     | 2     | GXXATGt                          | 689        | 826         | 46              | Yes               | MFTLLQSQLSAASSLSSSVCLTSMML<br>LSKTHLLYLYHTPVWLVSSES              |
| 77                                  | 0.07                     | 2     | cXXATGc                          | 3362       | 3454        | 31              | Yes               | MLHSTSIHSASLQDGNYPPLHISAAE<br>DLVIT                              |
| 80                                  | 0.07                     | 2     | GXXATGt                          | 3539       | 3706        | 56              | Yes               | MSDSLCCCLIALSTFCQSETLILERTE<br>GVVLIFVLSTFFLHIVCSFPWCLVCL<br>GCF |
| 57                                  | 0.06                     | 2     | cXXATGa                          | 2636       | 2776        | 47              | Yes               | MIKREGPLLLFITNDNRTLHNAQML<br>ASIPRNANFMKYDLFPSQSVQL              |

<sup>1</sup>No. of ATG from 5' end: A sequence may have many ATG triplets. This information tells you the number of an ATG's occurrence relative to the 5' end

<sup>2</sup>Reliability: For example, a reliability of 0.12 means that in our tests the reliability of the ldf score was only 12% and should therefore be treated with the upmost caution.

**Supplementary Table 6 | Gene Set Enrichment Analysis of target genes of *SATB1***

|                                         | HAN_SATB1_TARGETS_UP<br>(193 <sup>*</sup> ) |                                   |                | HAN_SATB1_TARGETS_DN<br>(224 <sup>*</sup> ) |                                   |                |
|-----------------------------------------|---------------------------------------------|-----------------------------------|----------------|---------------------------------------------|-----------------------------------|----------------|
|                                         | Inf vs. Non                                 | 6 <sub>3</sub> vs. 7 <sub>2</sub> | 10dpi vs. rest | Inf vs. Non                                 | 6 <sub>3</sub> vs. 7 <sub>2</sub> | 10dpi vs. rest |
| Number of significant enrichment genes  | 95                                          | 37                                | 92             | 106                                         | 55                                | 73             |
| Percent of significant enrichment genes | 49.2%                                       | 19.2%                             | 47.7%          | 47.3%                                       | 24.6%                             | 32.6%          |

\* represents the total number of orthologous genes in chicken matched to Gene sets of HAN\_SATB1\_TARGETS (Homo sapiens).

**Supplementary Table 7 | The transcriptional enhancers in the human and mouse genomes  
by Vista Enhancer Browser (<http://enhancer.lbl.gov>)**

| ID    | Human (hg19)               |                       | Mouse (mm9)                 |                  | Expression |
|-------|----------------------------|-----------------------|-----------------------------|------------------|------------|
|       | Coordinates                | Bracketing Genes      | Coordinates                 | Bracketing Genes |            |
| hs250 | chr3:18,169,362-18,170,237 | LOC339862(intragenic) | chr17:51,675,683-51,676,643 | C330011F03-Satb1 | Positive   |
| hs251 | chr3:18,844,368-18,845,392 | SATB1-KCNH8           | chr17:52,364,835-52,365,855 | Gm20098-Kcnh8    | Negative   |
| hs651 | chr3:18,898,614-18,899,860 | SATB1-KCNH8           | chr17:52,447,155-52,448,401 | Gm20098-Kcnh8    | Negative   |
| hs825 | chr3:18,916,569-18,917,473 | SATB1-KCNH8           | chr17:52,469,177-52,470,077 | Gm20098-Kcnh8    | Negative   |
| hs936 | chr3:19,027,747-19,029,355 | SATB1-KCNH8           | chr17:52,598,809-52,600,417 | Gm20098-Kcnh8    | Negative   |
| hs252 | chr3:19,033,849-19,034,569 | SATB1-KCNH8           | chr17:52,604,445-52,605,152 | Gm20098-Kcnh8    | Negative   |

Note:

Positive indicates that this sequence showed observable enhancer activities at E11.5.

Negative indicates that this sequence did not show observable enhancer activities at E11.5 and it was a negative enhancer at this developmental stage. This does not mean that this sequence is not an enhancer at another time point or a weak enhancer at this time point.

**Supplementary Table 8 | The coordinates of *SATB1* and *KCNH8* genes as well as non-coding RNA in human, mouse and chicken genomes**

| Genes/ncRNAs | Human (hg19)               | Mouse (mm9)              | Chicken (galGal3)       |
|--------------|----------------------------|--------------------------|-------------------------|
| SATB1        | Chr3: 18389133-18466829    | Chr17: 51875512-51971972 | Chr2: 35135980-35226779 |
| ncRNA        | Chr3:18,844,368-19,034,569 | Chr17: 52201562-52201871 | Chr2: 35231116-35236359 |
| KCNH8        | Chr3: 19190017-19577135    | Chr17: 52742034-53044544 | Chr2: 35538119-35650436 |

Note: ncRNAs for human were showed in Table, ncRNA for mouse is GM20098/NR\_045095, and for chicken is *linc-satb1*.

**Supplementary Table 9 | LincRNA as precursors for small regulatory RNAs**

| <b>Target name</b>     | <b>Accession</b> | <b>Query name</b> | <b>Description</b>                |
|------------------------|------------------|-------------------|-----------------------------------|
| <b>microRNAs</b>       |                  |                   |                                   |
| mir-684                | RF00876          | TCONS_00000218    | microRNA mir-684                  |
| mir-207                | RF00802          | TCONS_00000218    | microRNA mir-207                  |
| mir-279                | RF00754          | TCONS_00012819    | microRNA mir-279                  |
| MIR828                 | RF01026          | TCONS_00078633    | microRNA MIR828                   |
| mir-573                | RF01040          | TCONS_00025556    | microRNA mir-573                  |
| miR-430                | RF01413          | TCONS_00038360    | microRNA miR-430                  |
| mir-279                | RF00754          | TCONS_00064993    | microRNA mir-279                  |
| mir-207                | RF00802          | TCONS_00074891    | microRNA mir-207                  |
| <b>snoRNAs</b>         |                  |                   |                                   |
| TB11Cs4H1              | RF01539          | TCONS_00001014    | Trypanosomatid snoRNA TB11Cs4H1   |
| TB11Cs4H1              | RF01539          | TCONS_00000421    | Trypanosomatid snoRNA TB11Cs4H1   |
| sR11                   | RF01150          | TCONS_00014387    | Small nucleolar RNA sR11          |
| snoZ152                | RF00350          | TCONS_00014387    | Small nucleolar RNA Z152/R70/R12/ |
| ceN47                  | RF01637          | TCONS_00057778    | C. elegans snoRNA ceN47           |
| SNORA55                | RF00431          | TCONS_00074562    | Small nucleolar RNA SNORA55       |
| <b>telomerase RNAs</b> |                  |                   |                                   |
| Telomerase-vert        | RF00024          | TCONS_00074562    | Vertebrate telomerase RNA         |
| Telomerase-vert        | RF00024          | TCONS_00074562    | Vertebrate telomerase RNA         |

**Supplementary Table 10 | Primers used to confirm lincRNAs structure**

| PCR         | Primer name | Sequence (5' → 3')                                             | Product Length (bp) | Template | Annealing temperature (°C) |
|-------------|-------------|----------------------------------------------------------------|---------------------|----------|----------------------------|
| XLOC_038005 | S05         | F: 5' CTGAGCAAGGACGTAGAGA 3'<br>R: 5' CAGAGATGCTGTGACGTTT 3'   | 188                 | dscDNA   | 63                         |
| XLOC_017676 | S76         | F: 5' AGCTTTCATAGGGGTTTCA 3'<br>R: 5' GGAGCTCTTATGAAGGCTG 3'   | 179                 | dscDNA   | 61                         |
| XLOC_035296 | S96         | F: 5' ACAGTTGCACACCGTGTTC3'<br>R: 5' GTGTCCTTCCATGCCTGTT 3'    | 194                 | dscDNA   | 63                         |
| XLOC_041037 | S37         | F: 5' TTAACATCCAAGCAGCTAC 3'<br>R: 5' TTTTCCAGATGTTGATGTT 3'   | 480                 | dscDNA   | 63                         |
| XLOC_024939 | linc-satb1  | F: 5' GCTGCTCCTTTCAGTGCATT 3'<br>R: 5' CTGACATTGCTGACGCATCT 3' | 333                 | dscDNA   | 60                         |

**Supplementary Table 11 | Primers used to confirm lincRNAs and genes expression levels**

| qPCR           | Primer name | Sequence (5' → 3')               | Product Length (bp) | Template | Annealing temperature (°C) |
|----------------|-------------|----------------------------------|---------------------|----------|----------------------------|
| Linc-SATB1     | Q39         | F: 5' GGTGTAGTTGTAGGCCAGCA 3'    | 80                  | dscDNA   | 60                         |
|                |             | R: 5' TGCACGCCAGGTAAGCAATA 3'    |                     |          |                            |
| TCONS_00025507 | HOT TIP     | F: 5' GGGGAATAAAACAACGAGACAGA 3' | 120                 | dscDNA   | 60                         |
|                |             | R: 5' AGAACCATCGCACGTAGAGG 3'    |                     |          |                            |
| XLOC_000566    | Q66         | F: 5'GGCTTTCTCTGGGAGCTGTT 3'     | 127                 | dscDNA   | 60                         |
|                |             | R: 5'GACCTCTGGCTTTTCTCCCC 3'     |                     |          |                            |
| XLOC_039595    | Q89         | F: 5' ATGACCGTGGATAACAACA 3'     | 55                  | dscDNA   | 60                         |
|                |             | R: 5' GCACAGAGGTCGGTTAT 3'       |                     |          |                            |
| XLOC_041037    | Q41         | F: 5' GGA CTGATTACTTGGGCCCC 3'   | 67                  | dscDNA   | 60                         |
|                |             | R: 5' CCATCGCCTTCCCTTCTGTT 3'    |                     |          |                            |
| XLOC_000866    | Q06         | F: 5' GCACTACCCTGCCAAGTGAA 3'    | 152                 | dscDNA   | 60                         |

|                |      |                                |     |        |    |
|----------------|------|--------------------------------|-----|--------|----|
|                |      | R: 5' GGTTGCAACTGTGAGGCTTG 3'  |     |        |    |
| XLOC_041175    | Q26  | F: 5' TGAGGCCCTTGTAATGCCAG 3'  | 122 | dscDNA | 60 |
|                |      | R: 5' CTAGTCACCCTTCTGCCTGC 3'  |     |        |    |
| XLOC_025339    | Q30  | F: 5' TAAGCTACACCGCCACACAG 3'  | 162 | dscDNA | 60 |
|                |      | R: 5' TCCCTGGACCACATCAGACT 3'  |     |        |    |
| TCONS_00025995 | Q95  | F: 5' ACATCTCCCTTCTAGCCTGGT 3' | 140 | dscDNA | 60 |
|                |      | R: 5' AAGTTCACAGCTGGCTCTCC 3'  |     |        |    |
| TCONS_00026001 | Q01  | F: 5' TCTCCCTCCCAGACTGAAG 3'   | 111 | dscDNA | 60 |
|                |      | R: 5' GGAAGGAATTGCAGCGCTTC 3'  |     |        |    |
| TCONS_00026148 | Q48  | F: 5' TTCCCAAGAACGATGCTGCT 3'  | 104 | dscDNA | 60 |
|                |      | R: 5' CAATCGATGGGCTGGTTGTG 3'  |     |        |    |
| TCONS_00000515 | Q15  | F: 5' CTCCATGTGCATCCCTTGGT 3'  | 126 | dscDNA | 60 |
|                |      | R: 5' GCATCGTCGCTTTAGTCACAC 3' |     |        |    |
| TCONS_00000516 | Q16  | F: 5' GTCTGCGGAATCAAGGGACA 3'  | 189 | dscDNA | 60 |
|                |      | R: 5' CACCTTCACCATGGCAGTCC 3'  |     |        |    |
| TCONS_00050793 | Q93  | F: 5' CAGACCATAAGCGCTGTCCA 3'  | 90  | dscDNA | 60 |
|                |      | R: 5' TGCTGGATGTATTGGCAGCA 3'  |     |        |    |
| TCONS_00050859 | Q59  | F: 5' CACCCTTAGCAAGTCCTGGG 3'  | 104 | dscDNA | 60 |
|                |      | R: 5' CTCTAGTACAGCGCCACCAG 3'  |     |        |    |
| SATB1          | SA-1 | F: 5' AGCCCAGCAGTCCTTAAACC 3'  | 165 | dscDNA | 60 |
|                |      | R: 5' ACTGCCTGTGAGATTCCTGC 3'  |     |        |    |
| HOXA2          | HA-2 | F: 5' TGCGAGTTGAAGGCCATGAA 3'  | 155 | dscDNA | 60 |
|                |      | R: 5' AGTGTCGAGTGTGAAAGCGT 3'  |     |        |    |
| HOXA3          | HA-3 | F: 5' GCGACCTACTACGACAGCTC 3'  | 129 | dscDNA | 60 |
|                |      | R: 5' GCGGTGGTACTCAGTTTCCA 3'  |     |        |    |
| HOXA4          | HA-4 | F: 5' TGAAACCAAAACCCGACGA 3'   | 96  | dscDNA | 60 |
|                |      | R: 5' GAGGGCAAGAGAGGGTTTCC 3'  |     |        |    |
| HOXA9          | HA-9 | F: 5' CGCTGGAAGTGGAGAAGGAG 3'  | 180 | dscDNA | 60 |
|                |      | R: 5' CCCCATATCCCCATCATTCG 3'  |     |        |    |

|        |       |                               |     |        |    |
|--------|-------|-------------------------------|-----|--------|----|
| HOXA10 | HA-10 | F: 5' CTACGTGTCGGGGATGGAAG 3' | 152 | dscDNA | 60 |
|        |       | R: 5' CCTTGGGGCACTTCTCTGAG 3' |     |        |    |
| HOXA11 | HA-11 | F: 5' CCGTCTTCTCGCCCTATGAC 3' | 179 | dscDNA | 60 |
|        |       | R: 5' GTGGAAGGCAAGCAGTCTCT 3' |     |        |    |
| HOXA13 | HA-13 | F: 5' TCGCCGACAAGTACATGGAC 3' | 78  | dscDNA | 60 |
|        |       | R: 5' CCTGGTAGAAGGCGAACTCC 3' |     |        |    |
| LEF1   | LF-1  | F: 5' CTACCATGACAAGGGCAGGG 3' | 171 | dscDNA | 60 |
|        |       | R: 5' GATGTTCTGGGGATGGGTGG 3' |     |        |    |
| TCF7   | TF-7  | F: 5' AAGCAGCAGGACTCCAACTC 3' | 78  | dscDNA | 60 |
|        |       | R: 5' GTCCGTTTGTGGTTGAGGC 3'  |     |        |    |
| CD8A   | C8-A  | F: 5' AAAGGCCATCTCCCACACAG 3' | 86  | dscDNA | 60 |
|        |       | R: 5' CGGTGTCACTCTGCTCCTTT 3' |     |        |    |
| CD8B   | C8-B  | F: 5' CAGCCAGGAGAAGTTCAGCA 3' | 126 | dscDNA | 60 |
|        |       | R: 5' ATGAGCTGGGAGGACTGGAT 3' |     |        |    |
| GAPDH  | HK-1  | F: 5'-GAGGGTAGTGAAGGCTGCTG-3' | 307 | dscDNA | 60 |
|        |       | R: 5'-ACCAGGAAACAAGCTTGACG-3' |     |        |    |



## The sequence of linc-satb1:

### TCONS\_00025519

```
>galGal3_ct_UserTrack_3545_TCONS_00025519_0 range=chr2:35231116-35232293 5'pad=0 3'pad=0 strand==+
repeatMasking=noneCTCTTTCTCTCTTTCTTTTTTTCCCTTCTTTTTATCTTTTCCTTATTTTGACTTTGAG
GTGCATTTTCTCTTCTGCTCTGGGAATTGGCAGATACAGTTCCTGTAGGCAACTTTGCATCAAGACAG
AGACTGTGAAGTTGATACCTCAGTGCTTTTCTTAGCTGTGCTCTTCTATTAATTGGTGTTAGAAAAGTGC
AACCTTGTAGCACAGTTATTGAATAATCATTAATCTGTGGAGGATACACAAGCCCAAAGGTTAATAAT
AACAATTAATAATAGTGACTTTGCTAGCAGGGAGACTATTTTCTCATAGTTATTAAGGCACTCCCAT
TTATGCTATGTATGGAGAGGTGAATTTGGCCCTGGTGTGCTGAATACCACTTTACCGCAGCAAGCCCA
CAGATGAATCCTCCCCATTATCTCCATGCTGTCAGGTCTCTCGCTTTTTCTCCCTTTAAAATGTATCAAA
CACTGCTCTCATTTTAAATAGAAATGCTCAGGCTTTAATCAATTCTGACATTTCCACTGGAAAATAACA
TCTAGCTCTCTTACACAGATAAAAATTTATTTGCCTGCAGCTGGTCTGCTGTAGCGCTTTGGACCTATT
CGCTTCTCAGAGAAGACTTGGCTTTTCATGGTCTCTAGGTACCACGGGGCAATAAATAGAAAGTCAGT
GCAAGGGGGATGTTACACTTTTACAGTCACAACTCTCCGCTGCCTCCTCGCTGAGCTCTTCTGTCTGC
CTAACCGCATGCTCCTGTTGTCCAAGACCCATCTCCTTATTTGTATCACACCCCTGTCTGGCTGGTCA
GTGAATCTTAATAATAATCATGTTTCATGTCTCAGAAATCTAATAATCAAGTTACTCATTTCGTATAAAT
TGCAACTAAGCTGTTTGGATTTCGTTGTGTTATCCCCACTTTAAAGGCACGGAAACTGAAACAGAAAAA
TTAACACATTTGCCTGAGGCCACACATGGATTGAAGAGTATGTCCAGCACTGGAAGTGAATTCTGTAT
TTAGACCATGCTTCTCTTAAAGATTGTGAAGCACACTGTGAAAATGTTTTTAAAGAAAGGAATGTA
GTATAAACCTTATTTTCCATTGACTTTGTATACTAGTCAAATGCATGCCTTTTTTTTTTTTTGGGGGGG
GGGGGGGGGGGGGGGAG
```

```
>galGal3_ct_UserTrack_3545_TCONS_00025519_1 range=chr2:35232838-35234977 5'pad=0 3'pad=0 strand==+
repeatMasking=noneGGGGGGGGGGGAGGTTTAAATATATATCACGTTTCCTTTTTTAAATACAAGATTTAT
TTGACTTTTGACAAAGCACGGTGGAAACCTTTCAGTTGCAGTCAGCTTACTGTGGAAACAAGAAACATT
TACTGTGAGATTGTGAGCAGTAATGGGAACAGAATTGCTTGTATTAGGTTATTGTAAACAGTATCCAT
TGGATGTTACGGTGTAGTTGTAGGCCAGCACAATATAATGAGAAGTTCAGCACTAGTACAGATAAGGT
GCTATTGCTTACCTGGCGTGCATCAGTTTCCACCGTAATTCTCCTTCAGTGCTTTCAGTAGCAAAATAC
TTAGTGTGGGTTTAAAGCACTGAAAAACATGTGGGACAGCCATATACTGTGAGAGTTATGATTTATATC
ATTAAGCAGTGAGTCTTGCAGTGTGTTGTGTCCTCATGTCAATGAAGCAAGAAGTATACTGCCGGCCCT
TTAGCTGTGGCATGTCATCAAAGCTATATTATGGTATGACTGAGCACAGATGGCATGTCTAAAAGCA
GGTGTACAATATAACTTTTCATATTACTGACACGTAGATATTTCTCTTCTCAGTGCTTTCAGTAGCAAAATAC
GTTTGTCTGCCAACCTTCTACAGGAATAAAGAAAGTCTGCTCATCCTGCTCATCCTTCATGTCTGG
AATTGTATCATCAAAACCCATAGAGAATATGTGTTTATATATATTTGTATGATTTATGCTGACAGCTC
CTTCTGAGTTTTTTTTTTCAGAGTCTGATTTGAGGAAAGTGGATGCAGATCTCACTCAAATAATCTTTCT
CCAATACTATCAACATTGCCTGCCAAAAATAAAAAGTGGCATATGAATCACAATAATCACTCATGATT
TGGTGGATTTAAAGCCTGCGAAGGAGCATTAGAAATCCACATGGTGCTCCTGAGCTTTATGGACTTTG
AATGGTGGTAAAGTATATTTAGCCTAAGACTATCTTATTGATGATCTGTCTTATATGGGCTGCAGATC
TATCACCTATTCAAGTGAAGGACAATATTAATTGAAGCTATCTCTGTCCAAATGTTTATCTTTTCAGGTG
AGGTAATGAAACTGTTGAATCTGCAGACTGAAACCGTCAGAAGCCTTTCCTGAGGTGCCCTTACTGA
AATGCTACTGTGGCATAATGATTTGGAAATAAGCTTTTGTGTGAGAAGAGCTATCGGATCCTCTGGGA
AACATTACAGATACTTTCCAGTTCCTTTTCAGACATGTAAATATGTTTAGACATGAGCAGAGGGTAGAG
CTGGGGAGTGGAGTAGGGTGGGGTTAGAAGCTTCTCATAGATCCTGGAACCAATAAATACATGCGT
TTTTTTTTCTTCTTATCTGATGTTAGCTGGAACCTTGAATGGTCAATATTGAGAAGAAAAACTGCATAA
ATGTGTGTATATGTAAGAGTTATGTTGACCCATGATTAAGAGAGGGTCTCTTCTGCTGTTTCATCAC
AAATGATAACAGAACTCTCCATAATGCTCAGATGCTTGCATCGATCCCAAGAAATGCGAACTTTATGA
AGTATGACTTGTTCCTGCTCAAAGTGTGCAGCTATAGCTATAGCACTGAAAACCGTTGCATGCTATCT
```

AGCATTCTCATGATTTTTGCTTTCTTCATGATTTAAGCTAAGCACATCAGAACTGAAGATAACGTTT  
TAACCTATAAGAACAGCAGCCTGACTTCTGTAATGTGCTCATGTGCTATTACCTGTGAAACAGAGCAA  
GAAGACTGCTCACTAGCAGGGTCTGCCCATCGCTGTCCAGCTGCCTAATGACATGTAAAGACTTGGTTT  
CAGCAACTGTGCTCCAACCAGTATTACTATAAATTGGTTGCAGTTGAAGATGTCAGTAAAAAATACAA  
TCAGGCTGGAGTGTCTATGCATATTTAAATGCAAATGGCCGTTATCAGCTGTATCATAACTTTATCT  
GATGTCTGATCTTAGTGGTGGCTCTGTGGAAAAGACTCAGATGACTTTTTCTGAACACAGCTGCTCCTT  
TCAGTGCATTTCTGCAGTCTTTTGATTATCTTACTTACTATCTGTTGGCTAGACACCAACCTCCTGAACT  
TAGGCCTGTGTCACCTCACTACCTGT

>galGal3\_ct\_UserTrack\_3545\_TCONS\_00025519\_2 range=chr2:35235064-35236359 5'pad=0 3'pad=0 strand=+  
repeatMasking=noneTTTCTTCCAGCCACTCACTGGGGGTGCTTGTTCAGGCCCTGATGCTGCACAGTAC  
CTCAATCCATTCAGTCTCTTCAAGATGGTAACTACTTTCCGCTCCACATCTCTGCTGCAGAAGATCTT  
GTGATTACCTGAAAAAGTGAATTGCATCCTGTAGATTTCCCCTTAAAACCTTCTGCTTCACAGAAGAGAT  
CAGCTTGTGACAGATGCGTCAGCAATGTCAGACTCACTTCTCTGTTGCCTAATTGCCCTCTCCACCTTC  
TGCAATCTGAAACTCTCATTTTGGAAAGGACTGAAGGAGTTGTATTAATATTTGTGCTATCCACATTT  
TTCTGCATATTGCTGCTCCTTCCCTTGGTGTCTGGTTTGTCTTGGCTGCTTTTAAAAAATTCTGTTGCCT  
CTAGTGAGGGACTGCCAGATTAACCAGTACAGAGAATCCAGGTGACTGTCTACTTTTACAAATATAG  
GTTGTGTATAATAAATTCAGGTTTTACATCTATGCAAATTAAGTCATCATATGATTATGACTACATGCA  
TTTTTTTATCAAATATGGCATATATTCACAAATTATATTTAACTTATACACATGTTGCTATTCTGAATA  
CCTGACTAGGAATTACAAAGTGTGTCACTAGATCTTAGTAAGTGGGCTTATGGAACAAGAAGAAATAA  
GAGAAAATCACCTCTTTTCCCTTGCAATTCCTGACAAGTCCAGTGTAAGGGCTTTTCCTACTCTAGATGGC  
AATATAAACACCTTACCACAGAGCTGTTGAGAGATAAAAAGTACATCTTGTGTTGGAAACTTAAAGAA  
TGTATGAAAAACAAAACAAAATACCCTAAAAAAGGAAGTTTTAAAGTAATGTGTCTTTGGTCTAGTGT  
TTGTCACATCTACTTGGTATGGCCTTCCTCTAATGTTTCAGTCATGCAGTGTAAGACATTAGTCACAAT  
GTCAAAATAAGCACATTA CTCTGCAAAAATGTATTTTACCTCAGGAATATTGTGAAGTGAAAATAG  
GATTTAGCACAATTCTTCTTTTGGAGTTTTTCTACAGACAGGACAGTTTTAGTGTAAGCTCTAAATCTT  
GCAAGATTATCCAGCATTAGGTACGACACATCTGGAAGAATCTGCCAACTGAGTGCTAGCAAGGAT  
TACGCTGAGAAGGTAACAACCTCAGTGCTTTCACTGTAAACCGTCCTCCACAACCTGCTGTTTTTTGGTGT  
TTTTGTGTGTGTGTGTTTCGTTTGTCTTTGTTTTCCGAATAAATAAACAATACTTTGTTGAGCTC
